# Supplementary material for: In silico study of PDE10A inhibitors for schizophrenia disease: Molecular docking, ADMET and DFT analysis
Source: Research Square preprint supplement (doi:10.21203/rs.3.rs-6532706/v1), 2025-05-06
Supplement: Supplementary file 1 [file 603d161d5bb85c2ed338c882.docx]

| LN | Ligand structure | **3D image** | **2D image** | **H.S**  **(KJ/**  **mol)** | **L.E.** | **LIPO** | **AMBIG** | **CLASH** |
| --- | --- | --- | --- | --- | --- | --- | --- | --- |
| 1. |  | 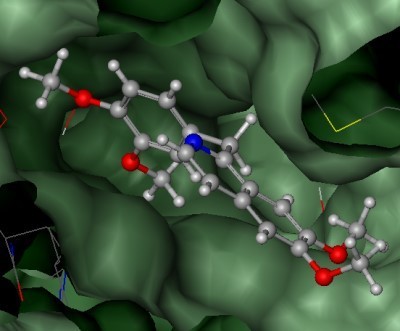 | 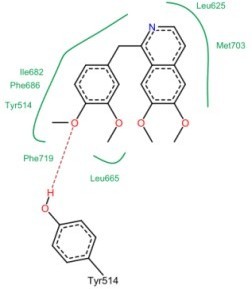 | -34 | 0.32 | -12.3248 | -3.5323 | 3.3895 |
| 2. |  | 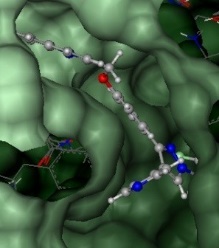 | 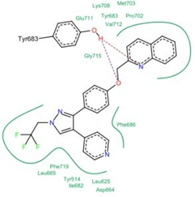 | -55 | 0.39 | -21.9623 | -9.8998 | 8.9917 |
| 3. |  | 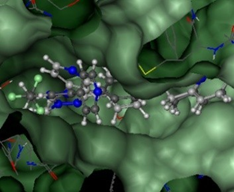 | 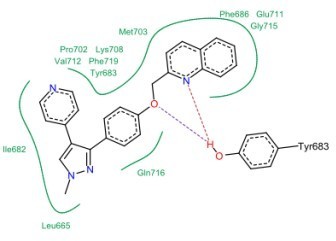 | -46 | 0.36 | -18.7460 | -9.5699 | 9.6045 |
| 4. |  | 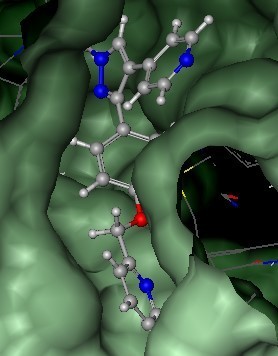 | 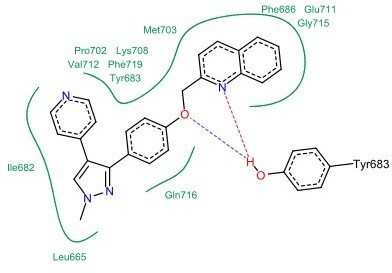 | -56 | 0.45 | -19.8936 | -8.9957 | 8.0668 |
| 5. |  | 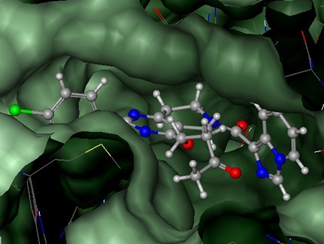 | 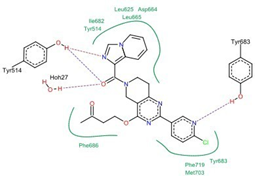 | -22 | 0.15 | -16.7136 | -9.0961 | 6.3666 |
| 6. |  | 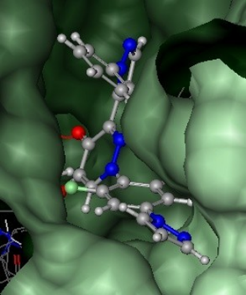 | 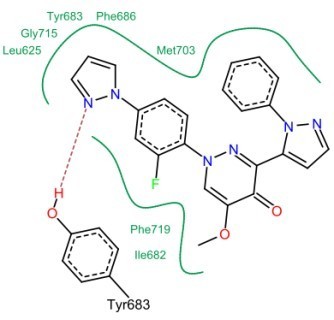 | -49 | 0.36 | -16.1625 | -7.1804 | 11.1140 |
| 7. |  | 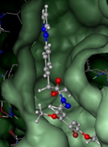 | 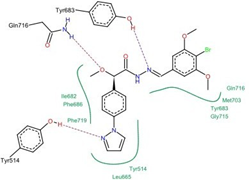 | -26 | 0.20 | -14.6262 | -8.0702 | 5.1380 |
| 8. |  | 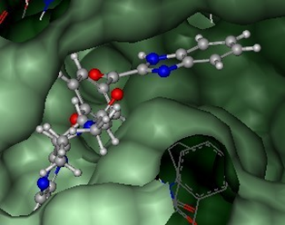 | 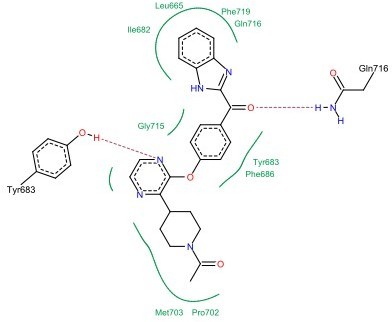 | -41 | 0.30 | -15.5927 | -8.0741 | 3.9173 |
| 9. |  | 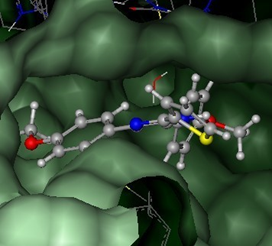 | 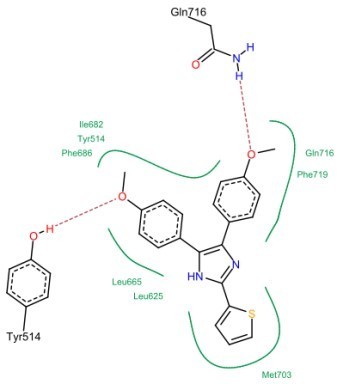 | -36 | 0.33 | -12.2370 | -3.8079 | 3.7773 |
| 10. |  | 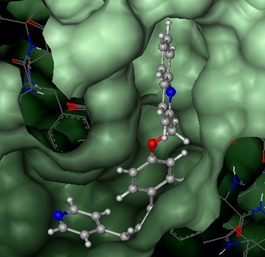 | 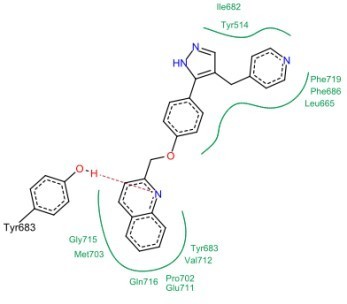 | -54 | 0.43 | -19.0045 | -7.3832 | 2.7135 |
| 11. |  | 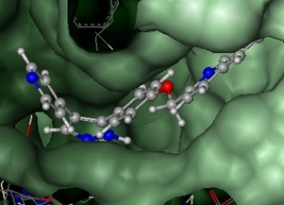 | 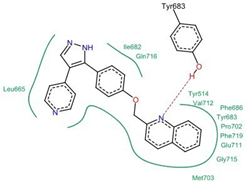 | -48 | 0.39 | -17.4675 | -7.7328 | 2.4646 |
| 12. |  | 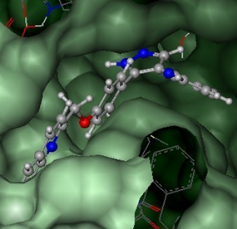 | 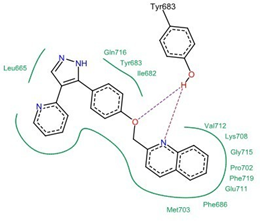 | -47 | 0.39 | -19.3780 | -8.3523 | 3.5980 |
| 13. |  | 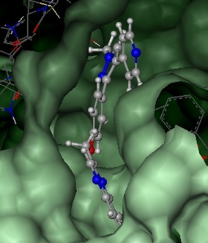 | 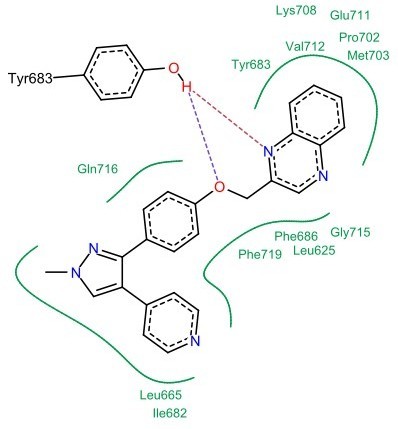 | -52 | 0.42 | -18.7483 | -8.1763 | 7.3513 |
| 14. |  | 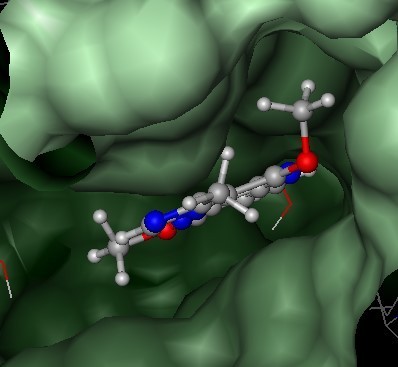 | 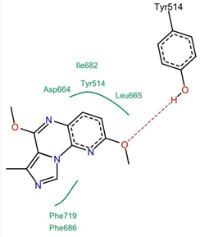 | -23 | 0.30 | -9.8017 | -5.5324 | 3.5303 |
| 15. |  | 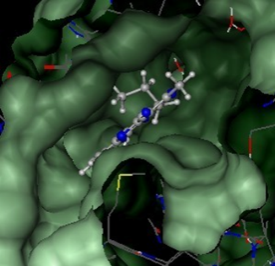 | 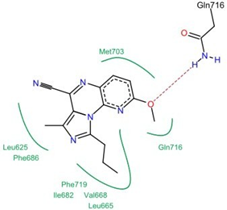 | -33 | 0.38 | -10.9162 | -5.2773 | 3.0832 |
| 16. |  | 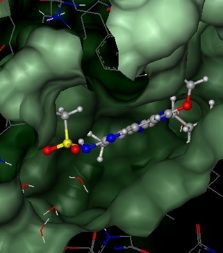 | 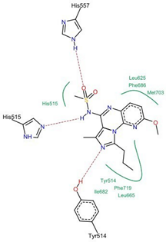 | -32 | 0.32 | -10.2614 | -4.7245 | 6.6594 |
| 17. |  | 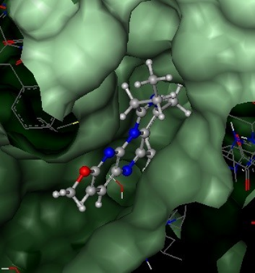 | 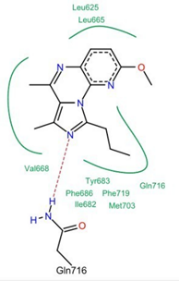 | -37 | 0.44 | -11.9187 | -5.6009 | 3.6759 |
| 18. |  | 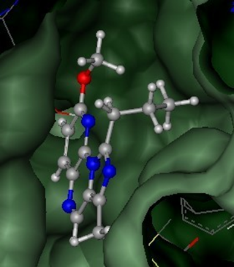 | 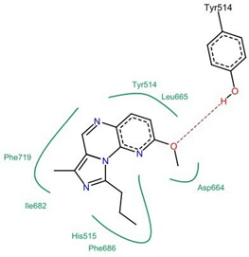 | -32 | 0.41 | -9.5664 | -5.3465 | 3.9031 |
| 19. |  | 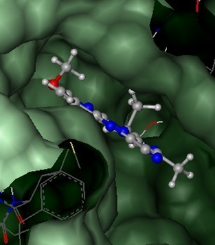 | 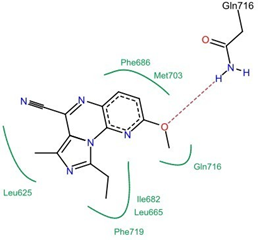 | -31 | 0.37 | -9.9566 | -3.5118 | 1.5788 |
| 20. |  | 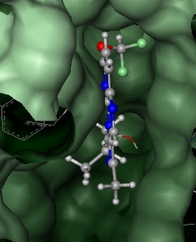 | 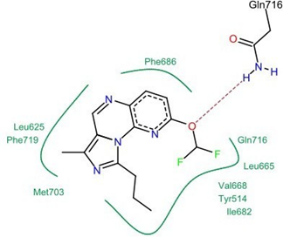 | -36 | 0.41 | -10.0179 | -4.6538 | 3.0065 |
| 21. |  | 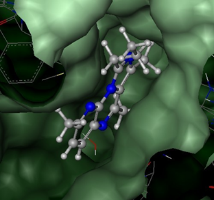 | 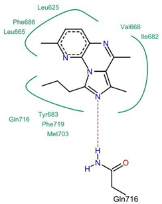 | -40 | 0.50 | -11.0932 | -5.3725 | 3.8464 |
| 22. |  | 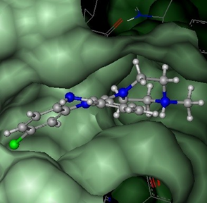 | 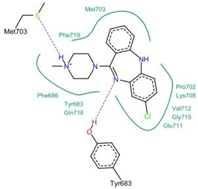 | -32 | 0.33 | -13.5977 | -7.3765 | 7.7653 |
| 23. |  | 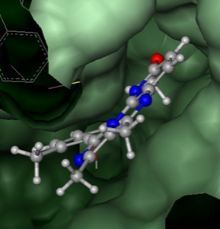 | 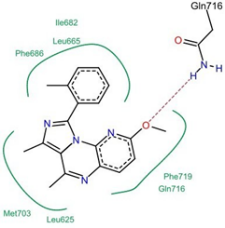 | -34 | 0.34 | -12.5727 | -4.7366 | 3.8709 |
| 24. |  | 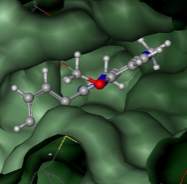 | 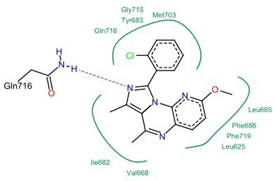 | -46 | 0.46 | -13.4403 | -6.1701 | 7.1149 |
| 25. |  | 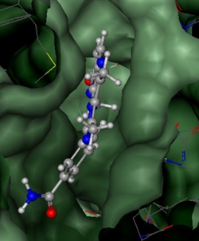 | 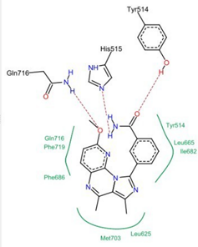 | -31 | 0.29 | -12.9520 | -5.8385 | 5.2308 |
| 26. |  | 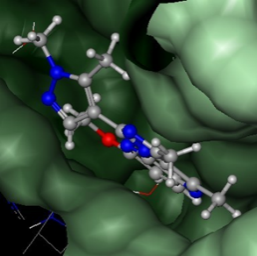 | 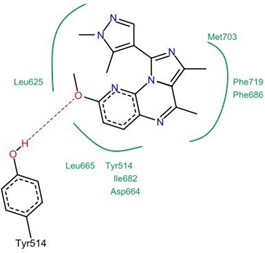 | -31 | 0.31 | -11.8068 | -5.4751 | 4.8556 |
| 27. |  | 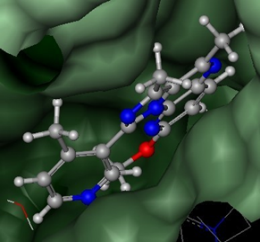 | 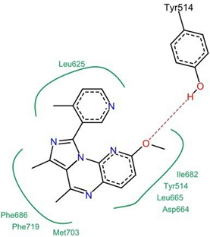 | -34 | 0.33 | -12.3053 | -4.8440 | 4.5816 |
| 28. |  | 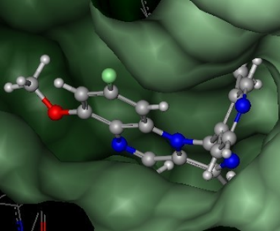 | 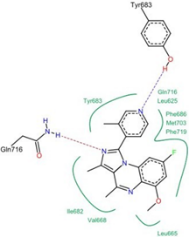 | -47 | 0.45 | -13.8797 | -5.9978 | 8.2227 |
| 29. |  | 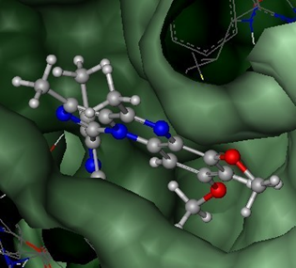 | 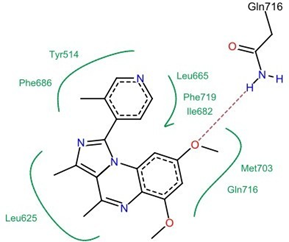 | -45 | 0.42 | -13.5092 | -4.9775 | 6.1113 |
| 30. |  | 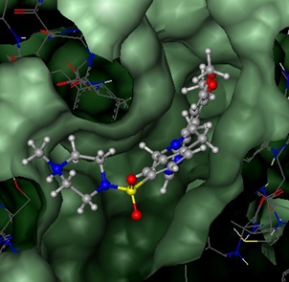 | 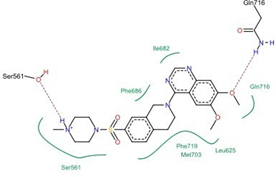 | -42 | 0.30 | -12.9489 | -4.7615 | 3.9000 |
| 31. |  | 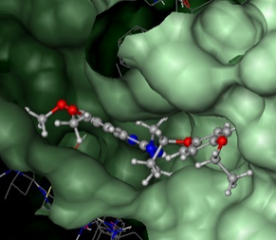 | 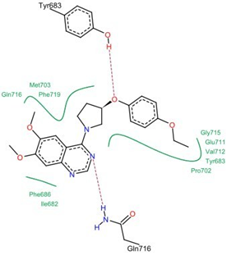 | -46 | 0.38 | -16.9239 | -7.5286 | 7.5868 |
| 32. |  | 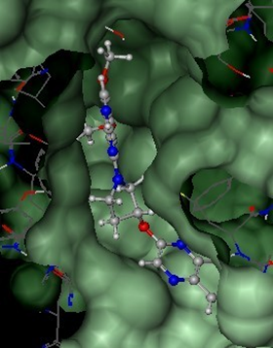 | 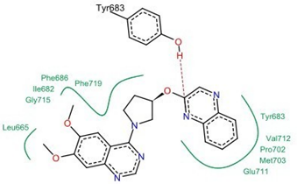 | -46 | 0.37 | -17.0237 | -8.1936 | 7.0871 |
| 33. |  | 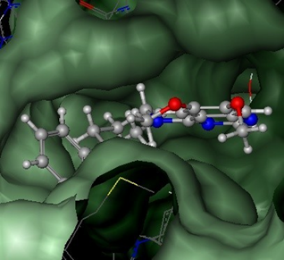 | 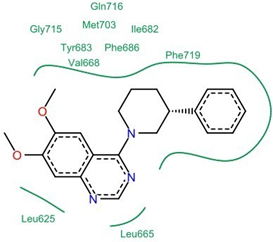 | -35 | 0.33 | -13.5330 | -4.8715 | 4.5523 |
| 34. |  | 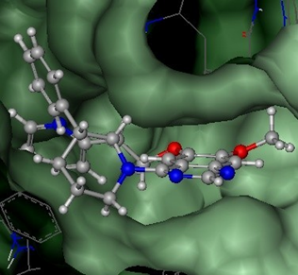 | 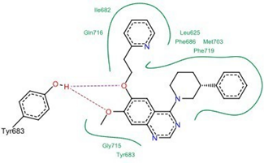 | -48 | 0.35 | -19.0965 | -6.1005 | 3.5516 |
| 35. |  | 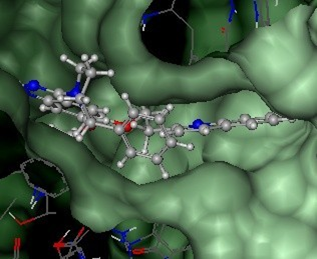 | 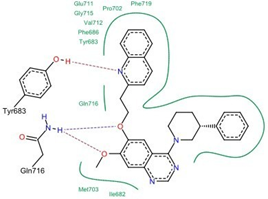 | -60 | 0.39 | -19.1865 | -9.1879 | 8.6474 |
| 36. |  | 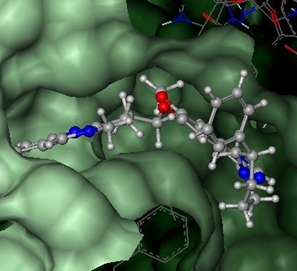 | 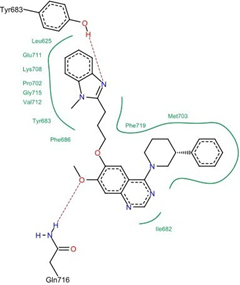 | -62 | 0.39 | -21.1720 | -8.8751 | 4.6082 |
| 37. |  | 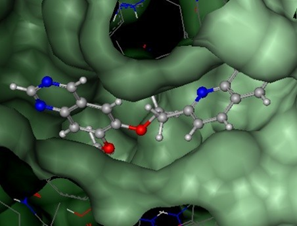 | 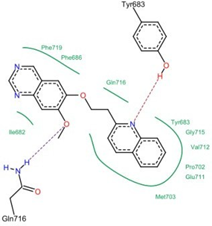 | -49 | 0.47 | -18.0356 | -7.7602 | 6.5841 |
| 38. |  | 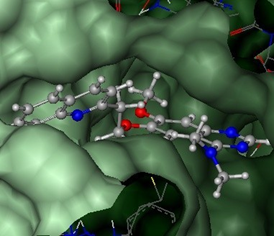 | 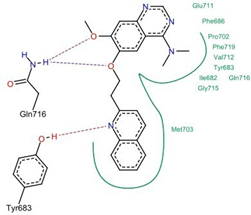 | -51 | 0.49 | -16.5503 | -8.4697 | 7.3443 |
| 39. |  | 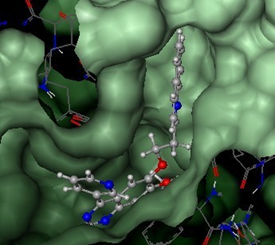 | 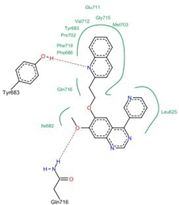 | -56 | 0.43 | -19.0302 | -8.2933 | 4.3541 |
| 40. |  | 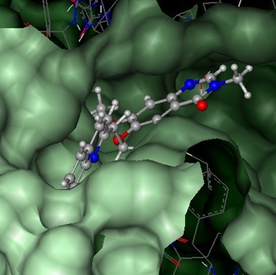 | 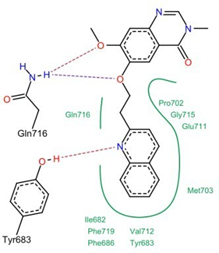 | -50 | 0.44 | -16.5872 | -8.2918 | 5.4790 |
| 41. |  | 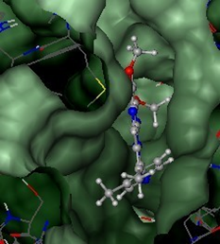 | 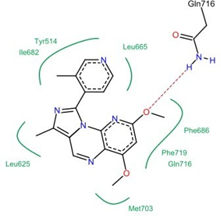 | -42 | 0.40 | -12.8953 | -5.8073 | 5.4327 |
| 42. |  | 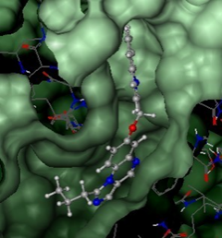 | 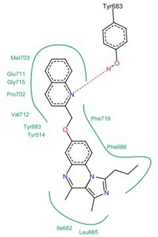 | -49 | 0.39 | -18.0594 | -7.6386 | 5.4532 |
| 43. |  | 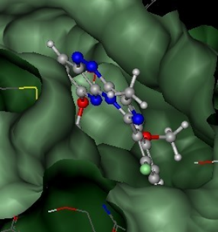 | 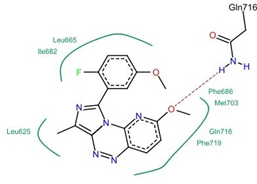 | -38 | 0.36 | -11.5757 | -5.2354 | 5.3663 |
| 44. |  | 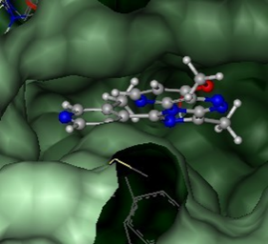 | 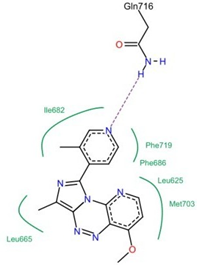 | -31 | 0.32 | -10.2718 | -3.6027 | 1.9631 |
| 45. |  | 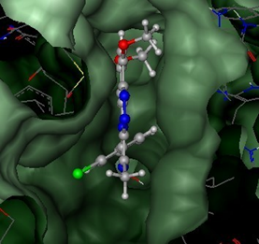 | 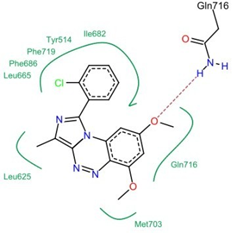 | -38 | 0.37 | -14.4242 | -5.1875 | 6.8150 |
| 46. |  | 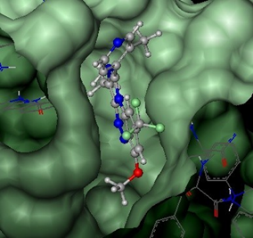 | 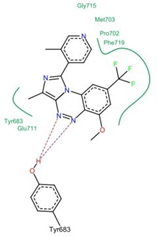 | -27 | 0.24 | -10.5581 | -7.5041 | 2.4363 |
| 47. |  | 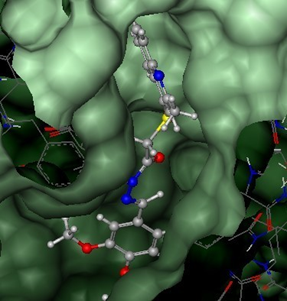 | 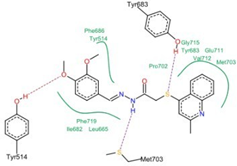 | -40 | 0.34 | -16.0746 | -7.9637 | 10.1144 |
| 48. |  | 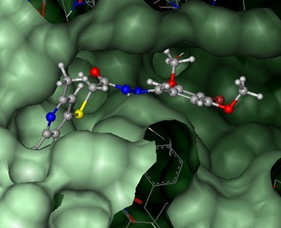 | 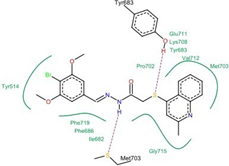 | -35 | 0.29 | -16.2157 | -8.3371 | 6.8796 |
| 49. |  | 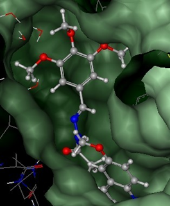 | 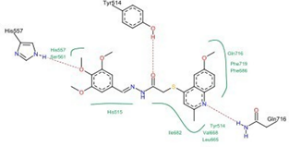 | -28 | 0.21 | -15.2485 | -11.7221 | 7.2419 |
| 50. |  | 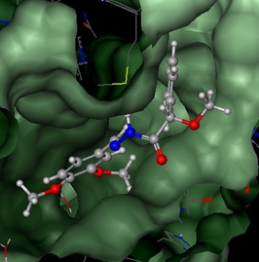 | 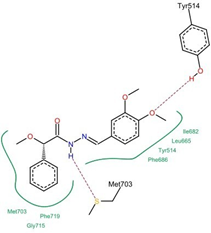 | -24 | 0.24 | -13.0555 | -7.9622 | 7.5354 |
| 51. |  |  |  | -19 | 0.16 | -13.0258 | -8.6871 | 6.6827 |
| 52. |  |  |  | -34 | 0.28 | -14.3512 | -8.3461 | 10.1894 |
| 53. |  |  |  | -19 | 0.15 | -15.2925 | -6.8988 | 7.6223 |
| 54. |  |  |  | -30 | 0.24 | -14.5513 | -6.1394 | 5.5783 |
| 55. |  |  |  | -16 | 0.18 | -9.3050 | -3.8638 | 2.2186 |
| 56. |  |  |  | -37 | 0.42 | -12.5619 | -6.9502 | 2.6923 |
| 57. |  |  |  | -35 | 0.35 | -15.1748 | -9.1140 | 5.6016 |
| 58. |  |  |  | -15 | 0.17 | -9.2021 | -3.8618 | 2.2225 |
| 59. |  |  |  | -12 | 0.14 | -7.9612 | -5.5383 | 2.5658 |
| 60. |  |  |  | -31 | 0.42 | -9.8071 | -6.8258 | 1.4460 |
| 61. |  |  |  | -47 | 0.45 | -16.0478 | -8.4560 | 4.1848 |
| 62. |  |  |  | -53 | 0.44 | -19.6974 | -8.7448 | 7.0453 |
| 63. |  |  |  | -54 | 0.46 | -19.4057 | -8.7504 | 6.4298 |
| 64. |  |  |  | -53 | 0.41 | -19.2823 | -9.7232 | 7.6648 |
| 65. |  |  |  | -59 | 0.51 | -18.9370 | -8.4303 | 5.9119 |
| 66. |  |  |  | -60 | 0.51 | -19.4875 | -8.8961 | 6.3741 |
| 67. |  |  |  | -59 | 0.51 | -19.5586 | -9.2680 | 6.5745 |
| 68. |  |  |  | -19 | 0.26 | -8.7072 | -4.1162 | 2.4580 |
| 69. |  |  |  | -29 | 0.40 | -9.3983 | -2.1273 | 1.4346 |
| 70. |  |  |  | -21 | 0.30 | -9.3179 | -2.9419 | 0.7800 |
| 71. |  |  |  | -36 | 0.51 | -10.7157 | -2.5414 | 2.5552 |
| 72. |  |  |  | -50 | 0.43 | -18.6699 | -8.2163 | 4.6456 |
| 73. |  |  |  | -52 | 0.38 | -19.1535 | -8.9864 | 6.7511 |
| 74. |  |  |  | -56 | 0.43 | -18.0885 | -8.1875 | 4.0541 |
| 75. |  |  |  | -56 | 0.44 | -18.1940 | -7.5429 | 8.0889 |
| 76. |  |  |  | -45 | 0.32 | -15.8267 | -6.5074 | 7.2048 |
| 77. |  |  |  | -53 | 0.38 | -21.0870 | -8.0782 | 6.0574 |
| 78. |  |  |  | -54 | 0.39 | -19.5927 | -9.4649 | 6.1430 |
| 79. |  |  |  | -35 | 0.40 | -11.4781 | -2.3967 | 2.6082 |
| 80. |  |  |  | -16 | 0.16 | -12.1220 | -6.8333 | 4.9933 |
| 81. |  |  |  | -28 | 0.26 | -10.6825 | -5.1894 | 4.1575 |
| 82. |  |  |  | -34 | 0.31 | -11.5069 | -2.8731 | 1.7952 |
| 83. |  |  |  | -18 | 0.17 | -14.7691 | -7.4277 | 7.9248 |
| 84. |  |  |  | -17 | 0.13 | -12.7852 | -7.7721 | 4.5948 |
| 85. |  |  |  | -37 | 0.29 | -16.0985 | -8.4421 | 7.0166 |
| 86. |  |  |  | -33 | 0.24 | -17.4716 | -10.8816 | 8.6693 |
| 87. |  |  |  | -39 | 0.39 | -13.5592 | -5.3954 | 5.4201 |
| 88. |  |  |  | -28 | 0.21 | -16.5465 | -6.3903 | 5.8089 |
| 89. |  |  |  | -39 | 0.28 | -16.8872 | -8.8152 | 6.6230 |
| 90. |  |  |  | -31 | 0.32 | -12.4942 | -4.5474 | 6.7690 |
| 91. |  |  |  | -59 | 0.45 | -18.2129 | -10.7909 | 14.0178 |
| 92. |  |  |  | -55 | 0.42 | -19.1650 | -10.2798 | 6.9461 |
| 93. |  |  |  | -51 | 0.39 | -18.6352 | -8.4427 | 4.2010 |
| 94. |  |  |  | -54 | 0.42 | -16.6913 | -8.8028 | 3.0318 |
| 95. |  |  |  | -59 | 0.46 | -17.8514 | -9.5954 | 4.6477 |
| 96. |  |  |  | -60 | 0.44 | -17.5705 | -8.6344 | 3.7620 |
| 97. |  |  |  | -53 | 0.38 | -19.1324 | -8.9027 | 6.4727 |
| 98. |  |  |  | -51 | 0.42 | -17.9856 | -10.3533 | 5.2483 |
| 99. |  |  |  | -51 | 0.42 | -17.9554 | -9.4619 | 3.9648 |
| 100. |  |  |  | -44 | 0.35 | -14.8422 | -9.0853 | 4.6661 |

**Author information**

**Authors and Affiliations**

Department of Chemistry, Babasaheb Bhimrao Ambedkar University (A Central University) Lucknow, Uttar Pradesh, 226025, India

Ashutosh Kharwar & Anjani Kumar Tiwari

**Author Contributions**

All the authors read and approved the final manuscript. AK: writing, designing, visualization; AKT: formal analysis and supervisor

**Corresponding author**

Correspondence to Anjani Kumar Tiwari.

**Ethics declarations**

**Ethical approval**

None to report.

**Disclosure statement**

**Conflict of Interest**

The authors declare that there are no conflicts of interest.

**Compliance with Ethical Standards**

This article does not contain any studies involving human or animal subjects.
